# Supplementary material for: Prevalence of missing data in the National Cancer Database and association with overall survival
Source: bioRxiv or medRxiv preprint supplement (doi:10.1101/2020.10.30.20220855), 2021-02-01
Supplement: Supplementary file [file media-1.pdf]

# Supplement

eTable 1. Variables in use for all diagnosis years and disease sites included in our analysis.

| Category              | Variable name               | Missing in at least one patient record | Variable of interest |
|-----------------------|-----------------------------|----------------------------------------|----------------------|
| Demographics          | AGE                         |                                        |                      |
| Demographics          | CDCC_TOTAL_BEST             |                                        |                      |
| Demographics          | CROWFLY                     | X                                      | X                    |
| Demographics          | FACILITY_LOCATION_CD        | X                                      | X                    |
| Demographics          | FACILITY_TYPE_CD            | X                                      | X                    |
| Demographics          | INSURANCE_STATUS            | X                                      | X                    |
| Demographics          | MED_INC_QUAR_00             | X                                      | X                    |
| Demographics          | MED_INC_QUAR_12             | X                                      | X                    |
| Demographics          | MED_INC_QUAR_16             | X                                      | X                    |
| Demographics          | MEDICAID_EXP_N_CODE         |                                        |                      |
| Demographics          | NO_HSD_QUAR_00              | X                                      | X                    |
| Demographics          | NO_HSD_QUAR_12              | X                                      | X                    |
| Demographics          | NO_HSD_QUAR_16              | X                                      | X                    |
| Demographics          | PUF_CASE_ID                 |                                        |                      |
| Demographics          | PUF_FACILITY_ID             |                                        |                      |
| Demographics          | PUF_MULT_SOURCE             |                                        |                      |
| Demographics          | RACE                        | X                                      | X                    |
| Demographics          | REFERENCE_DATE_FLAG         |                                        |                      |
| Demographics          | SEX                         |                                        |                      |
| Demographics          | SPANISH_HISPANIC_ORIGIN     | X                                      | X                    |
| Demographics          | UR_CD_03                    | X                                      | X                    |
| Demographics          | UR_CD_13                    | X                                      | X                    |
| Cancer Identification | BEHAVIOR                    |                                        |                      |
| Cancer Identification | CLASS_OF_CASE               |                                        |                      |
| Cancer Identification | DIAGNOSTIC_CONFIRMATION     | X                                      | X                    |
| Cancer Identification | GRADE                       | X                                      | X                    |
| Cancer Identification | HISTOLOGY                   |                                        |                      |
| Cancer Identification | LATERALITY                  | X                                      | X                    |
| Cancer Identification | PRIMARY_SITE                |                                        |                      |
| Cancer Identification | REGIONAL_NODES_EXAMINED     | X                                      | X                    |
| Cancer Identification | REGIONAL_NODES_POSITIVE     | X                                      | X                    |
| Cancer Identification | SEQUENCE_NUMBER             | X                                      | X                    |
| Cancer Identification | YEAR_OF_DIAGNOSIS           |                                        |                      |
| Stage                 | ANALYTIC_STAGE_GROUP        | X                                      | X                    |
| Stage                 | CS_EXTENSION                | X                                      | X                    |
| Stage                 | CS_METS_AT_DX               | X                                      | X                    |
| Stage                 | CS_METS_EVAL                | X                                      | X                    |
| Stage                 | CS_TUMOR_SIZEEXT_EVAL       | X                                      | X                    |
| Stage                 | CS_VERSION_LATEST           | X                                      | X                    |
| Stage                 | DX_STAGING_PROC_DAYS        | X                                      |                      |
| Stage                 | RX_SUMM_DXSTG_PROC          | X                                      | X                    |
| Stage                 | TNM_CLIN_M                  | X                                      | X                    |
| Stage                 | TNM_CLIN_N                  | X                                      | X                    |
| Stage                 | TNM_CLIN_STAGE_GROUP        | X                                      | X                    |
| Stage                 | TNM_CLIN_T                  | X                                      | X                    |
| Stage                 | TNM_EDITION_NUMBER          | X                                      | X                    |
| Stage                 | TNM_PATH_M                  | X                                      |                      |
| Stage                 | TNM_PATH_N                  | X                                      |                      |
| Stage                 | TNM_PATH_STAGE_GROUP        | X                                      |                      |
| Stage                 | TNM_PATH_T                  | X                                      |                      |
| Stage                 | TUMOR_SIZE                  | X                                      | X*                   |
| Treatment             | DX_CHEMO_STARTED_DAYS       | X                                      |                      |
| Treatment             | DX_DEFSURG_STARTED_DAYS     | X                                      |                      |
| Treatment             | DX_HORMONE_STARTED_DAYS     | X                                      |                      |
| Treatment             | DX_IMMUNO_STARTED_DAYS      | X                                      |                      |
| Treatment             | DX_OTHER_STARTED_DAYS       | X                                      |                      |
| Treatment             | DX_RAD_STARTED_DAYS         | X                                      |                      |
| Treatment             | DX_RX_STARTED_DAYS          | X                                      |                      |
| Treatment             | DX_SURG_STARTED_DAYS        | X                                      |                      |
| Treatment             | DX_SYSTEMIC_STARTED_DAYS    | X                                      |                      |
| Treatment             | PALLIATIVE_CARE             | X                                      | X                    |
| Treatment             | PALLIATIVE_CARE_HOSP        | X                                      | X                    |
| Treatment             | RAD_BOOST_DOSE_CGY          | X                                      | X                    |
| Treatment             | RAD_BOOST_RX_MODALITY       | X                                      | X                    |
| Treatment             | RAD_ELAPSED_RX_DAYS         | X                                      | X                    |
| Treatment             | RAD_LOCATION_OF_RX          | X                                      | X                    |
| Treatment             | RAD_NUM_TREAT_VOL           | X                                      | X                    |
| Treatment             | RAD_REGIONAL_DOSE_CGY       | X                                      | X                    |
| Treatment             | RAD_REGIONAL_RX_MODALITY    | X                                      | X                    |
| Treatment             | RAD_TREAT_VOL               | X                                      | X                    |
| Treatment             | READM_HOSP_30_DAYS          | X                                      | X                    |
| Treatment             | REASON_FOR_NO_RADIATION     | X                                      | X                    |
| Treatment             | REASON_FOR_NO_SURGERY       | X                                      | X                    |
| Treatment             | RX_HOSP_CHEMO               | X                                      | X                    |
| Treatment             | RX_HOSP_DXSTG_PROC          | X                                      | X                    |
| Treatment             | RX_HOSP_HORMONE             | X                                      | X                    |
| Treatment             | RX_HOSP_IMMUNOTHERAPY       | X                                      | X                    |
| Treatment             | RX_HOSP_OTHER               | X                                      | X                    |
| Treatment             | RX_HOSP_SURG_PRIM_SITE      | X                                      | X                    |
| Treatment             | RX_SUMM_CHEMO               | X                                      | X                    |
| Treatment             | RX_SUMM_HORMONE             | X                                      | X                    |
| Treatment             | RX_SUMM_IMMUNOTHERAPY       | X                                      | X                    |
| Treatment             | RX_SUMM_OTHER               | X                                      | X                    |
| Treatment             | RX_SUMM_RADIATION           | X                                      | X                    |
| Treatment             | RX_SUMM_SCOPE_REG_LN_SUR    | X                                      | X                    |
| Treatment             | RX_SUMM_SURG_OTH_REGDIS     | X                                      | X                    |
| Treatment             | RX_SUMM_SURG_PRIM_SITE      | X                                      | X                    |
| Treatment             | RX_SUMM_SURGICAL_MARGINS    | X                                      |                      |
| Treatment             | RX_SUMM_SURGRAD_SEQ         | X                                      | X                    |
| Treatment             | RX_SUMM_SYSTEMIC_SUR_SEQ    | X                                      | X                    |
| Treatment             | RX_SUMM_TRNSPLNT_ENDO       | X                                      | X                    |
| Treatment             | SURG_DISCHARGE_DAYS         | X                                      |                      |
| Outcomes              | DX_LASTCONTACT_DEATH_MONTHS | X                                      |                      |
| Outcomes              | PUF_30_DAY_MORT_CD          | X                                      |                      |
| Outcomes              | PUF_90_DAY_MORT_CD          | X                                      |                      |
| Outcomes              | PUF_VITAL_STATUS            |                                        |                      |

\*Tumor size was not used for prostate cancer given it is not routinely reported in clinical practice

eTable 2. Tabulation of patient records used to comparison of patient, tumor, and treatment characteristics. Patient records not used that have complete data are due to recoding of the variable for comparison.

A. Non-small cell lung cancer

|                        | Records used  |              | Records not used |              |
|------------------------|---------------|--------------|------------------|--------------|
|                        | Complete data | Missing data | Complete data    | Missing data |
| Age at Diagnosis       | 347,454       | 851,295      | 0                | 0            |
| Sex                    | 347,454       | 851,295      | 0                | 0            |
| Race                   | 347,454       | 842,127      | 0                | 9,168        |
| Hispanic Ethnicity     | 347,454       | 784,015      | 0                | 67,280       |
| Charlson-Deyo Score    | 347,454       | 851,295      | 0                | 0            |
| Insurance              | 347,454       | 827,936      | 0                | 23,359       |
| Facility Type          | 347,454       | 843,657      | 0                | 7,638        |
| Year of Diagnosis      | 347,454       | 851,295      | 0                | 0            |
| Overall Stage          | 347,395       | 776,500      | 59               | 74,795       |
| Tumor Size             | 346,962       | 626,110      | 492              | 225,185      |
| Lymph Nodes Involved   | 336,910       | 692,475      | 10,544           | 158,820      |
| Distant Metastasis     | 347,454       | 815,377      | 0                | 35,918       |
| Surgery (Primary Site) | 347,454       | 847,710      | 0                | 3,585        |
| Radiation              | 347,454       | 840,924      | 0                | 10,371       |
| Chemotherapy           | 347,454       | 811,051      | 0                | 40,244       |

B. Breast cancer

|                        | Records used  |              | Records not used |              |
|------------------------|---------------|--------------|------------------|--------------|
|                        | Complete data | Missing data | Complete data    | Missing data |
| Age at Diagnosis       | 959,679       | 1,161,096    | 0                | 0            |
| Sex                    | 959,679       | 1,161,096    | 0                | 0            |
| Race                   | 959,679       | 1,138,156    | 0                | 22,940       |
| Hispanic Ethnicity     | 959,679       | 1,049,841    | 0                | 111,255      |
| Charlson-Deyo Score    | 959,679       | 1,161,096    | 0                | 0            |
| Insurance              | 959,679       | 1,122,489    | 0                | 38,607       |
| Facility Type          | 959,679       | 1,067,375    | 0                | 93,721       |
| Year of Diagnosis      | 959,679       | 1,161,096    | 0                | 0            |
| Overall Stage          | 959,361       | 1,089,661    | 318              | 71,435       |
| Tumor Size             | 956,593       | 954,416      | 3,086            | 206,680      |
| Lymph Nodes Involved   | 945,511       | 991,196      | 14,168           | 169,900      |
| Distant Metastasis     | 959,361       | 1,083,580    | 318              | 77,516       |
| Surgery (Primary Site) | 959,679       | 1,156,603    | 0                | 4,493        |
| Radiation              | 959,679       | 1,139,214    | 0                | 21,882       |
| Chemotherapy           | 959,679       | 1,093,054    | 0                | 68,042       |
| Hormonal Therapy       | 959,679       | 1,066,418    | 0                | 94,678       |

C. Prostate cancer

|                        | Records used  |              | Records not used |              |
|------------------------|---------------|--------------|------------------|--------------|
|                        | Complete data | Missing data | Complete data    | Missing data |
| Age at Diagnosis       | 698,468       | 460,167      | 0                | 0            |
| Sex                    | 698,468       | 460,167      | 0                | 0            |
| Race                   | 698,468       | 441,710      | 0                | 18,457       |
| Hispanic Ethnicity     | 698,468       | 386,668      | 0                | 73,499       |
| Charlson-Deyo Score    | 698,468       | 460,167      | 0                | 0            |
| Insurance              | 698,468       | 436,545      | 0                | 23,622       |
| Facility Type          | 698,468       | 459,296      | 0                | 871          |
| Year of Diagnosis      | 698,468       | 456,869      | 0                | 3,298        |
| Overall Stage          | 698,468       | 460,167      | 0                | 0            |
| Tumor Size             | 698,430       | 403,550      | 38               | 56,617       |
| Lymph Nodes Involved   | 668,940       | 356,173      | 29,528           | 103,994      |
| Distant Metastasis     | 698,429       | 417,866      | 39               | 42,301       |
| Surgery (Primary Site) | 698,468       | 456,891      | 0                | 3,276        |
| Radiation              | 698,468       | 449,371      | 0                | 10,796       |
| Chemotherapy           | 698,468       | 423,743      | 0                | 36,424       |
| Hormonal Therapy       | 698,468       | 419,513      | 0                | 40,654       |

eFigure 1. Non-small cell lung cancer patient survival by whether data is missing in key variables and by cancer stage.

### A. Stage I\*

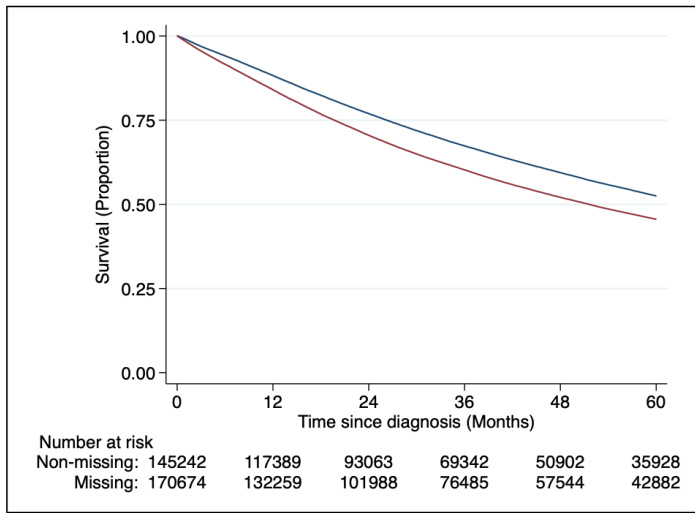

### B. Stage II

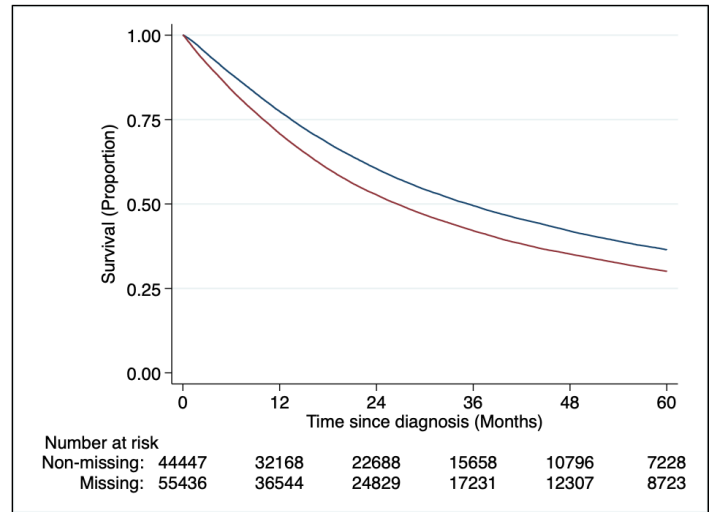

### C. Stage III

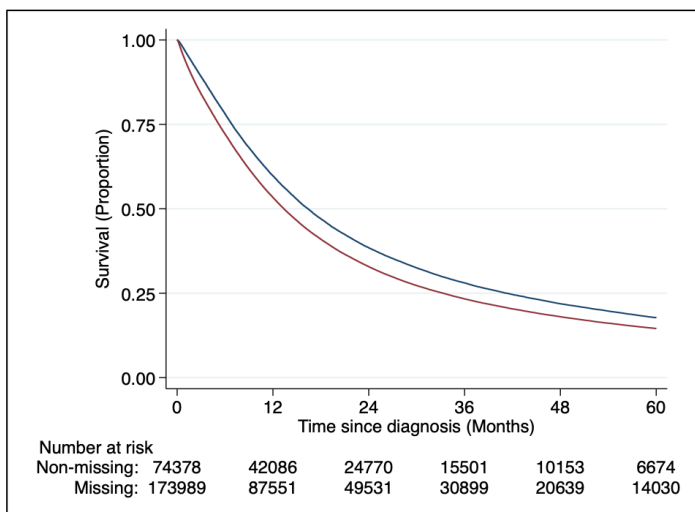

### D. Stage IV

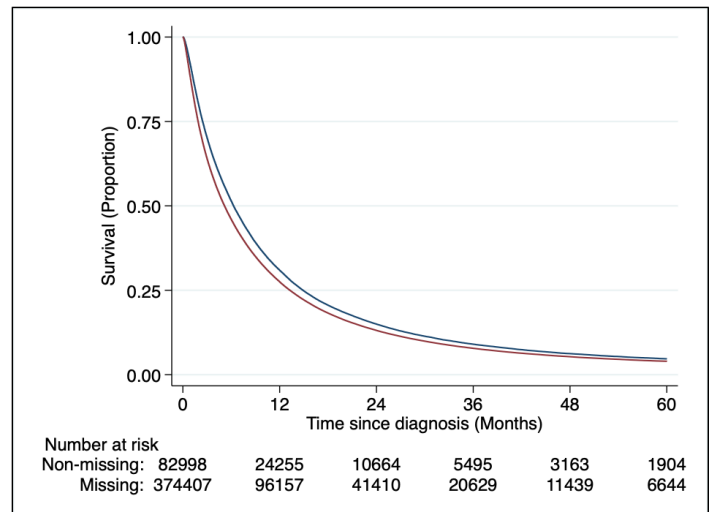

\*Analytic group stages 0 and I were combined for stage I subgroup analysis for NSCLC

— Non-missing data  
 — Missing data

eFigure 2. Breast cancer patient survival by whether data is missing in key variables and by cancer stage.

### A. Stage I

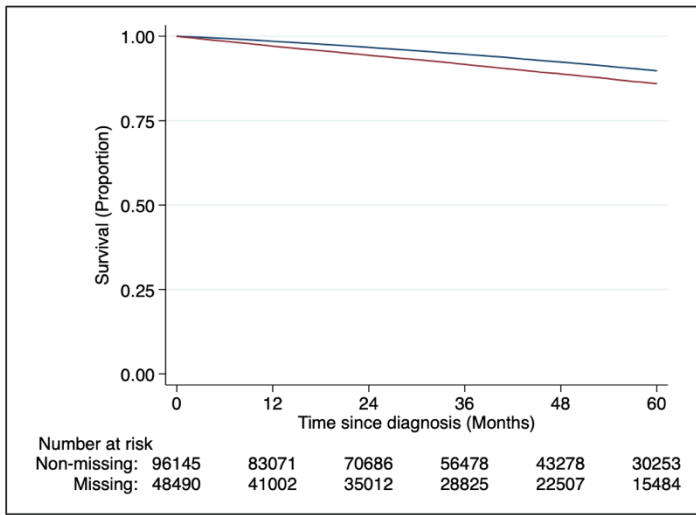

### B. Stage II

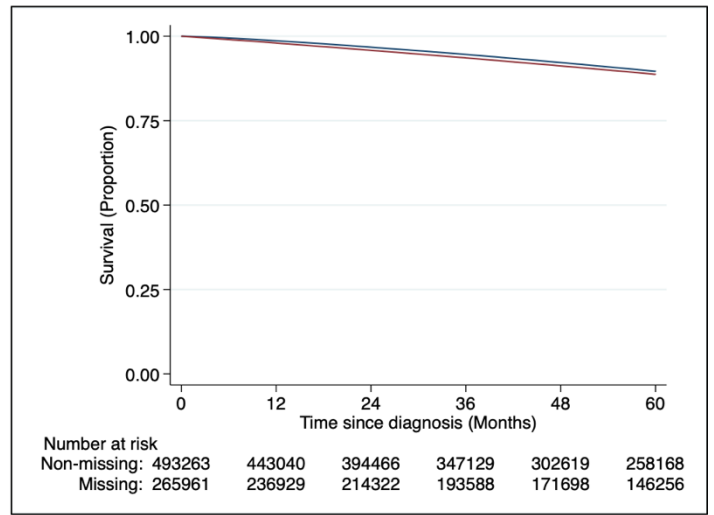

### C. Stage III

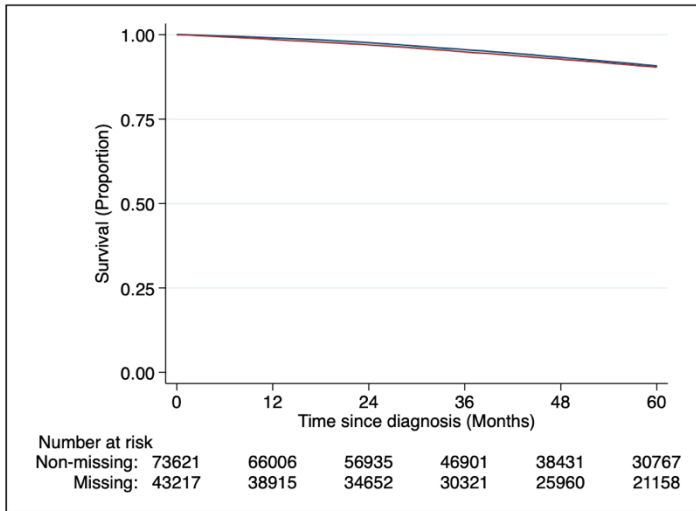

### D. Stage IV

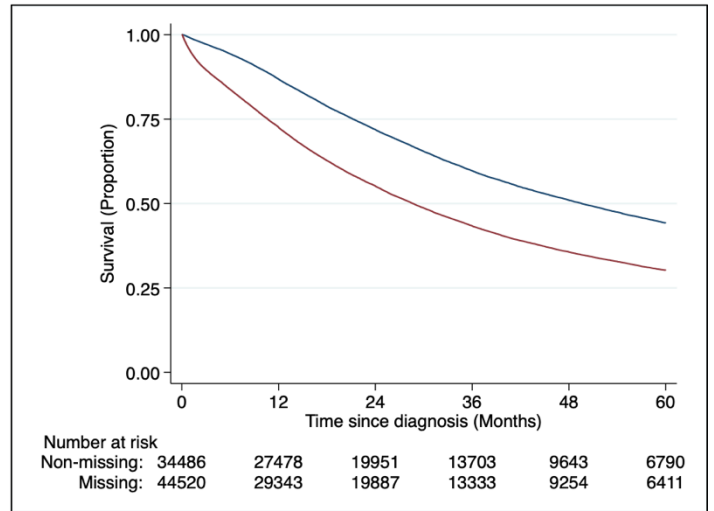

— Non-missing data

— Missing data

eFigure 3. Prostate cancer patient survival by whether data is missing in key variables and by cancer stage.

### A. Stage I



### B. Stage II

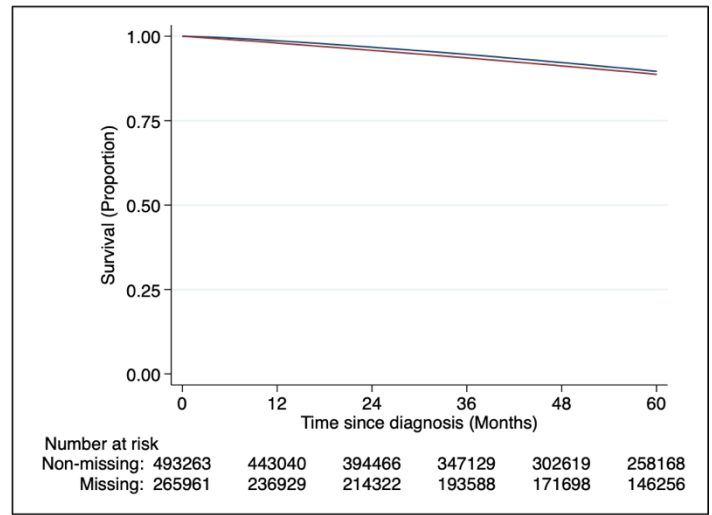

### C. Stage III



### D. Stage IV

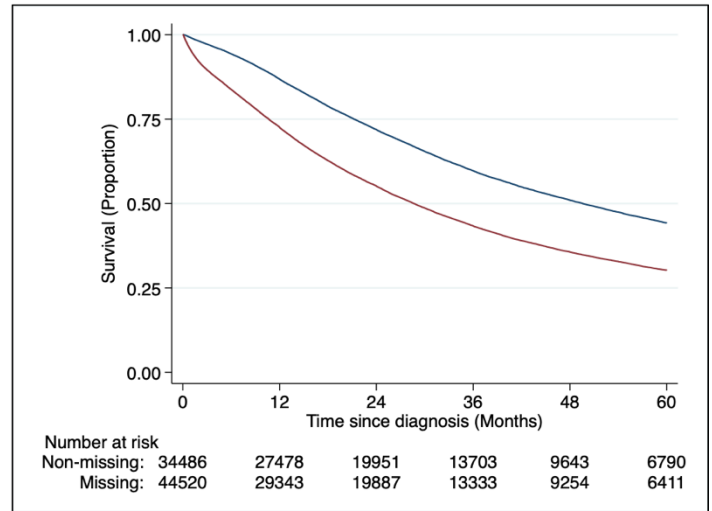

— Non-missing data

— Missing data

eFigure 4. Cancer patient survival by whether data is missing in key variables and by treatment received.

**A. Non-small cell lung cancer**

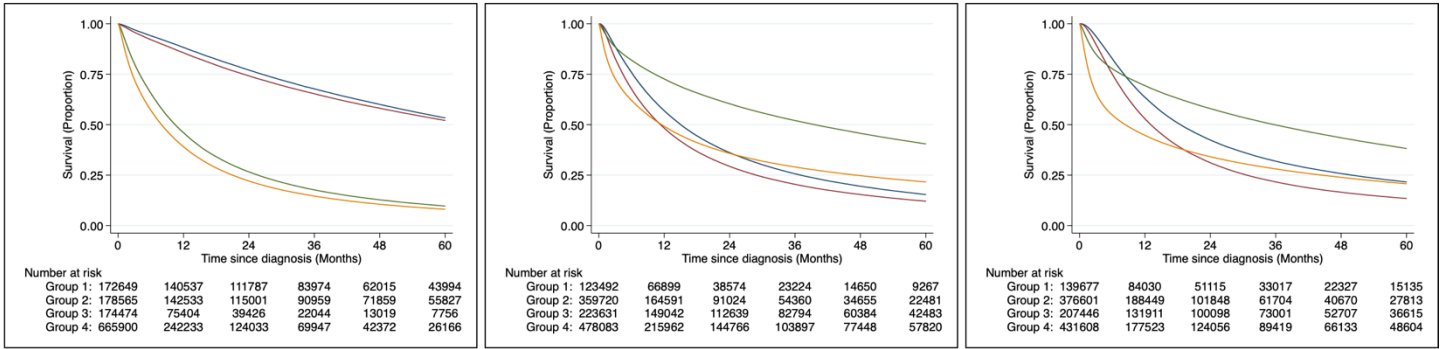

Surgery

Radiation

Chemotherapy

**B. Breast cancer**

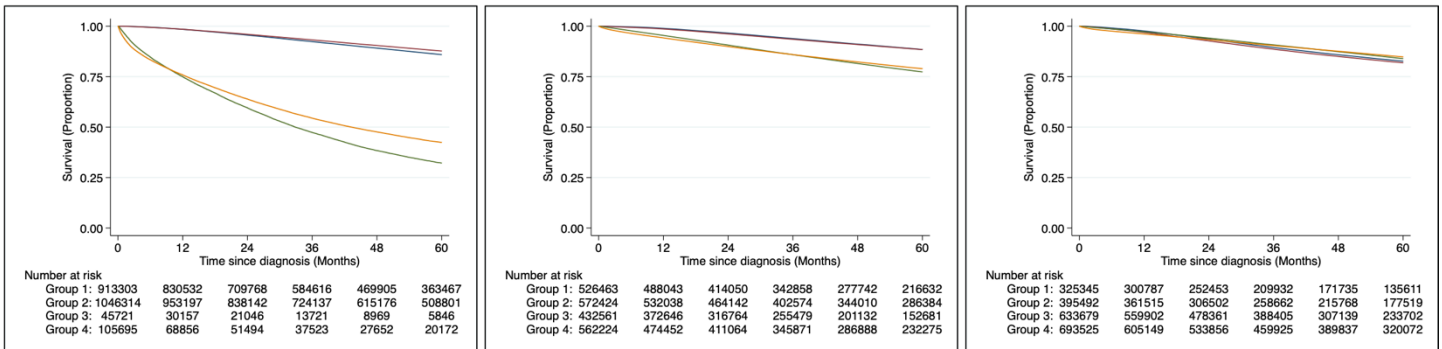

Surgery

Radiation

Chemotherapy

**C. Prostate cancer**

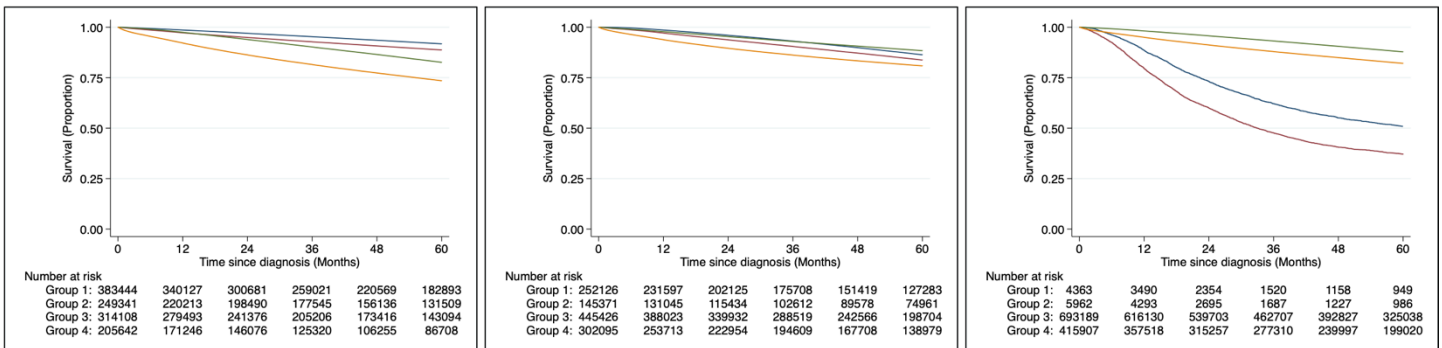

- Group 1: Received treatment, non-missing data
- Group 2: Received treatment, missing data
- Group 3: No treatment, non-missing data
- Group 4: No treatment, missing data

eFigure 5. Distribution of missingness by year of diagnosis.

A. Non-small cell lung cancer

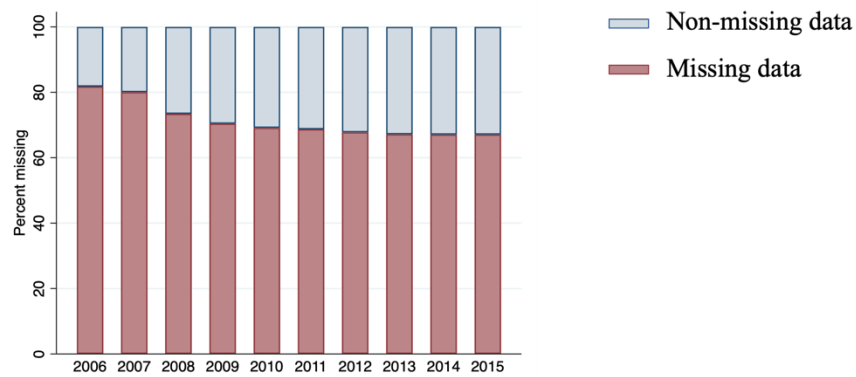

B. Breast cancer

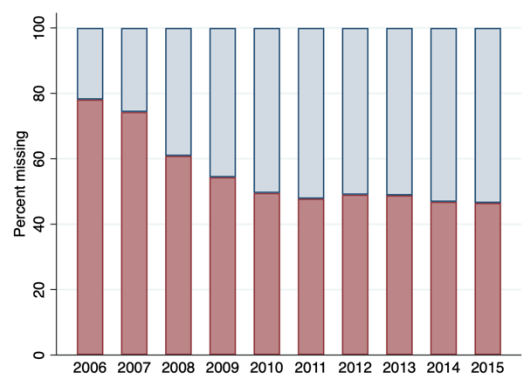

C. Prostate cancer

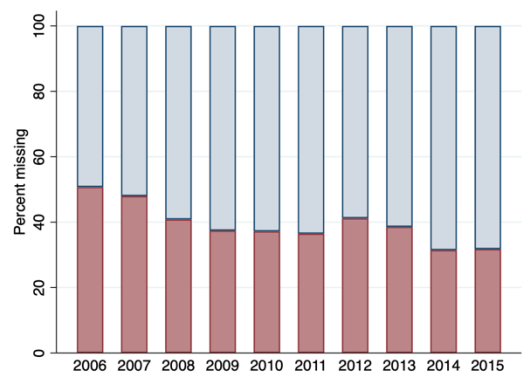

eFigure 6. Distribution of cancer stage by year of diagnosis.

A. Non-small cell lung cancer

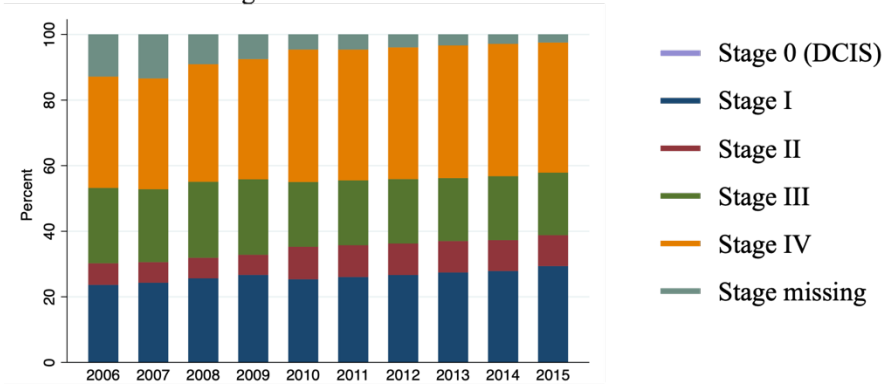

B. Breast cancer

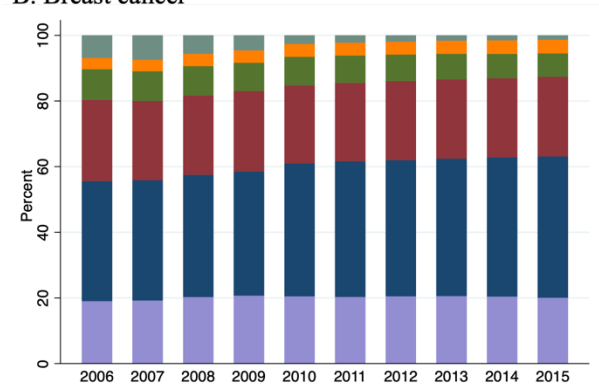

C. Prostate cancer

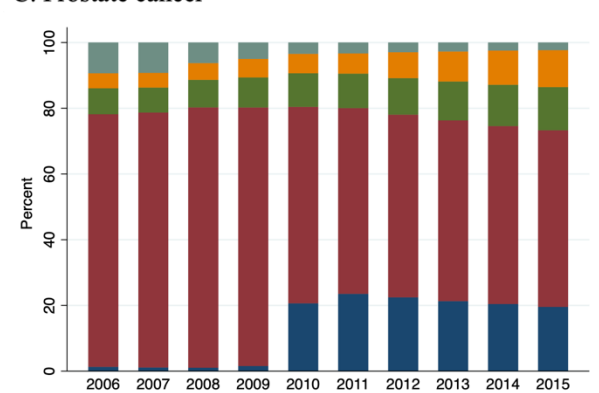



eFigure 7. Cancer patient survival whether data is missing in key variables and year of diagnosis.

Diagnosed between 2006 to 2010

Diagnosed between 2011 to 2015

A. Non-small cell lung cancer

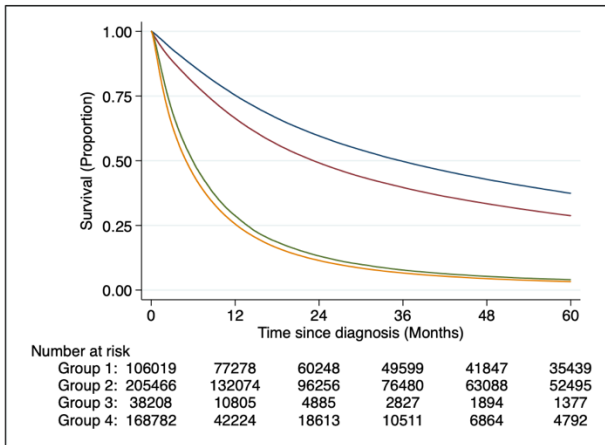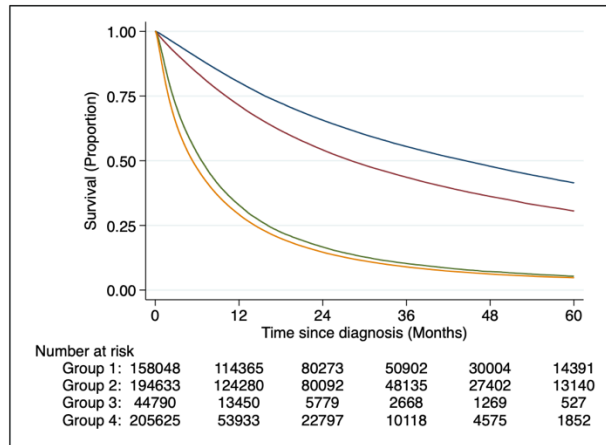

B. Breast cancer

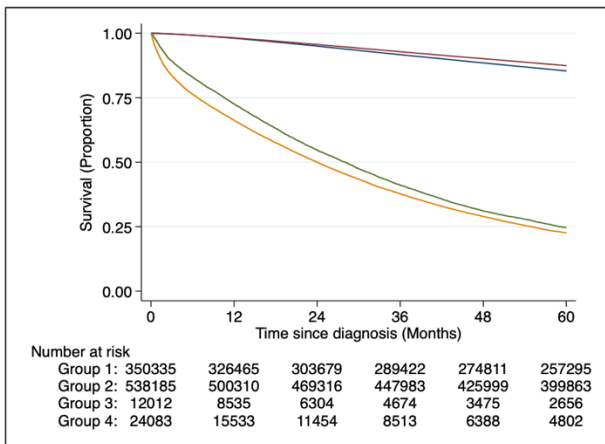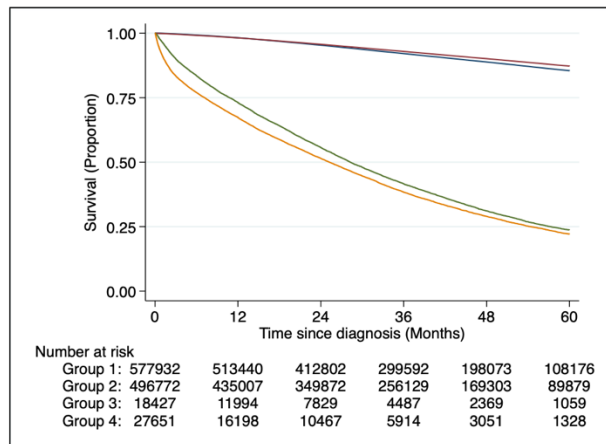

C. Prostate cancer

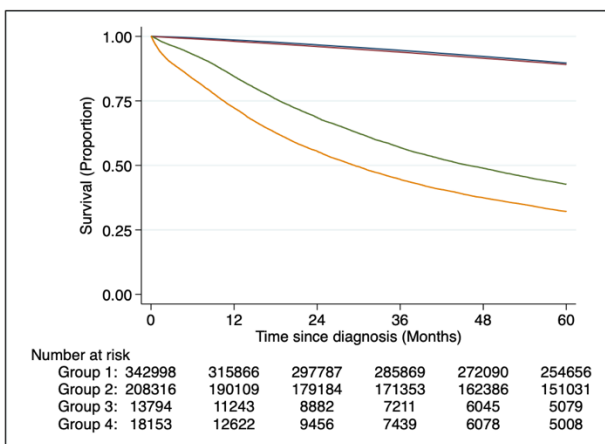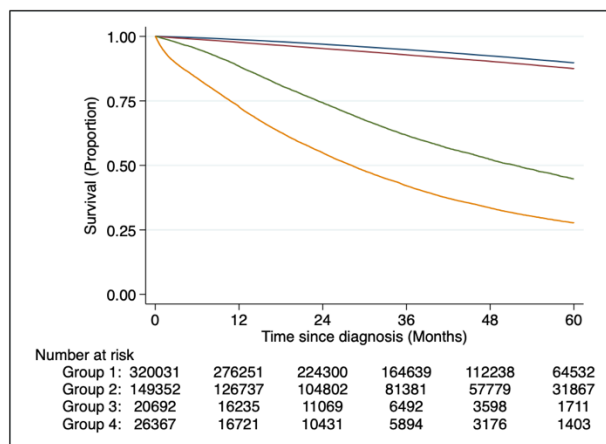

- Group 1: Non-metastatic patients, non-missing data
- Group 2: Non-metastatic patients, missing data
- Group 3: Metastatic patients, non-missing data
- Group 4: Metastatic patients, missing data

eFigure 8. Survival differences between patients with and without complete data in variables with missing data in 1-20% of patients.

### A. Non-small cell lung cancer patients

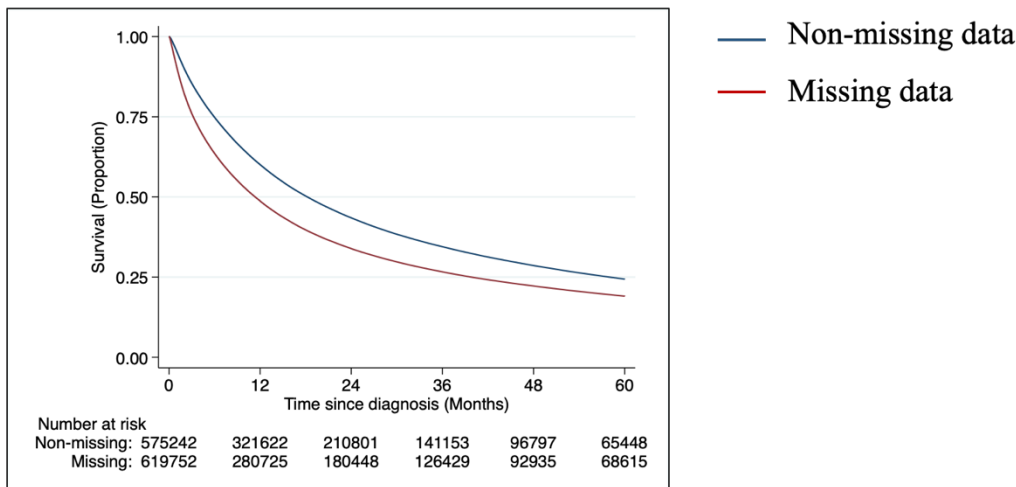

### B. Breast cancer patients

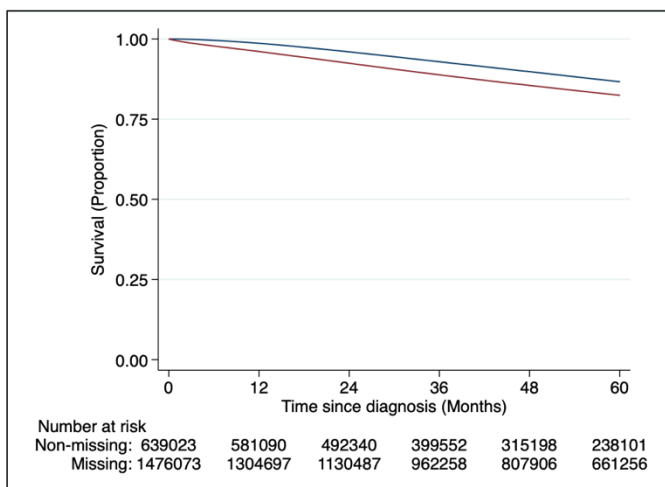

### C. Prostate cancer patients

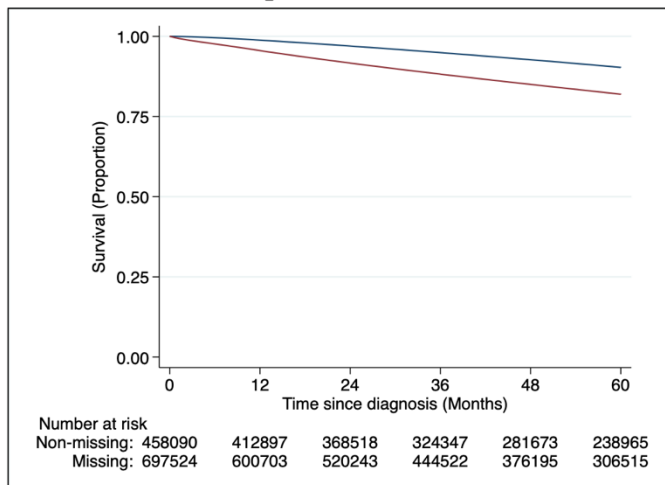

eFigure 9. Sensitivity analysis varying percentage of missing for variables of interest.

1-5% missing

>5-30% missing

A. Non-small cell lung cancer

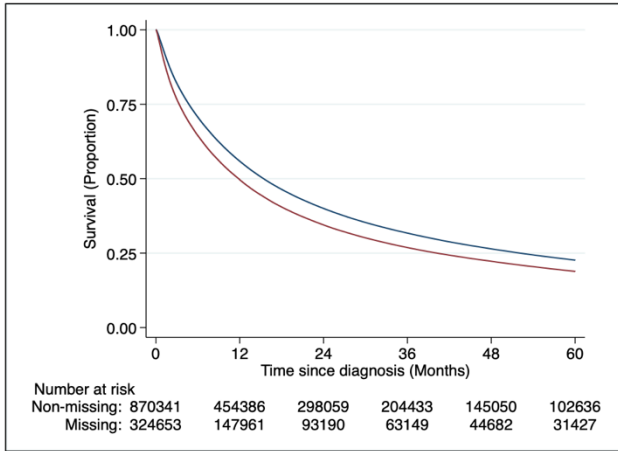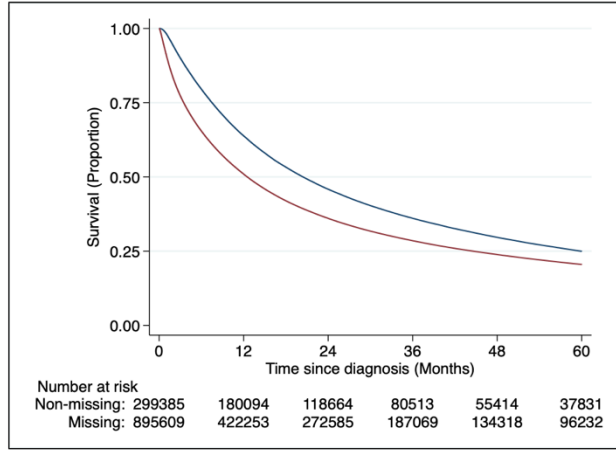

B. Breast cancer

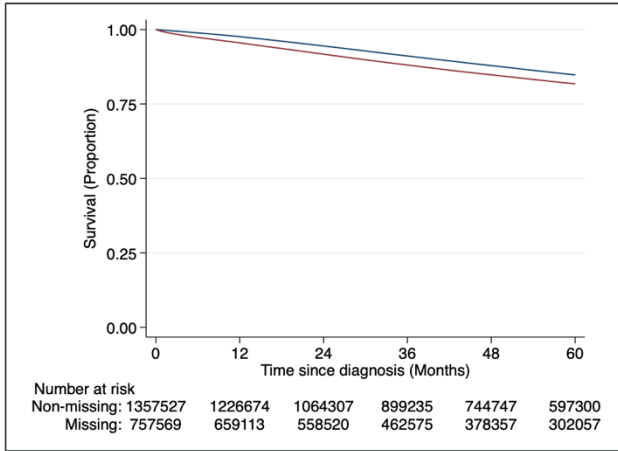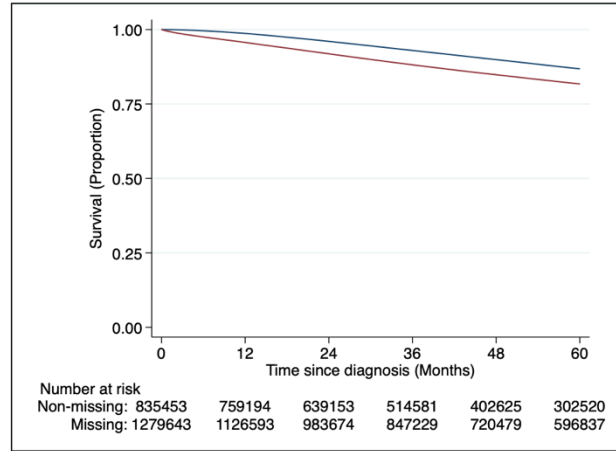

C. Prostate cancer

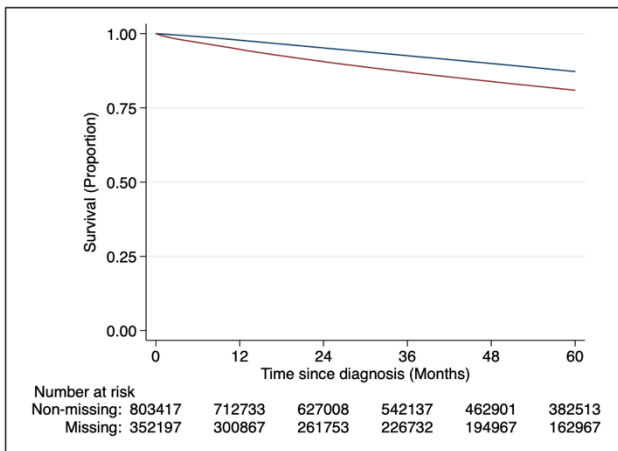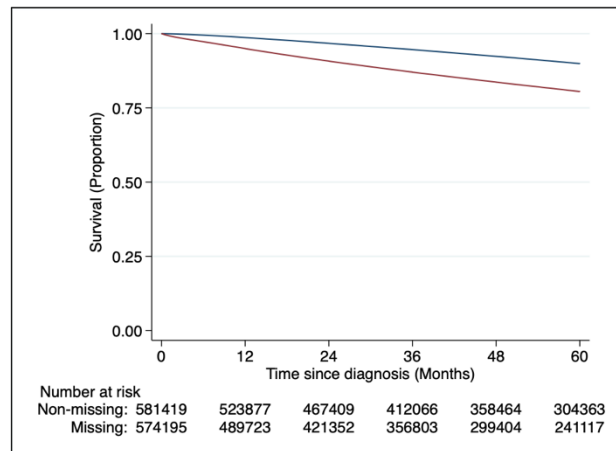

— Non-missing data  
 — Missing data
